# Supplementary material
Source: PubMed Central journal article supplement (PMC3811510)
Supplement: AEM.02167-13_zam021134835so1.pdf [file AEM.02167-13_zam021134835so1.pdf]

**Table S1** Primers used in this study.

| Primer | Reference  | Sequence 5'-3'          | Tm (°C) | Target site      |
|--------|------------|-------------------------|---------|------------------|
| 610IIF | a          | GTG CCA GCA GCC GCG GT  | 57      | 569 on16S        |
| 609F   | -          | GGA TTA GAT ACC CBD GTA | 50 - 54 | 840 on 16S       |
| 1390F  | b          | TTG TAC ACA CCG CCC GTC | 53      | 1390-1407 on 16S |
| 606F   | -          | ACC GCC CGT MRC C       | 48-52   | 1385 on 16S      |
| 606Fa  | this study | ACC GCC CGT CAC A       | 44      | 1385 on 16S      |
| 630R   | c          | CAK AAA GGA GGT GAT CC  | 50 - 52 | 1529 on 16S      |
| 1035R  | d          | TTC GCT CGC CRC TAC     | 48 - 50 | 242 on 23S       |

- <sup>a</sup> **Ustinova I, Krienitz L, Huss VAR.** 2001. *Closteriopsis acicularis* (G. M. Smith) Belcher *et Swale* is a fusiform alga closely related to *Chlorella kessleri* Fott *et Nováková* (Chlorophyta, Trebouxiophyceae). *Eur. J. Phycol.* **36**: 341-351.
- <sup>b</sup> **Zheng DD, Alm EW, Stahl DA, Raskin L.** 1996. Characterization of universal small-subunit rRNA hybridization probes for quantitative molecular microbial ecology studies. *Appl. Environ. Microbiol.* **62**: 4504-4513.
- <sup>c</sup> **Juretschko S, Timmermann G, Schmid M, Schleifer KH, Pommerening-Roser A, Koops HP & Wagner M.** 1998. Combined molecular and conventional analyses of nitrifying bacterium diversity in activated sludge: *Nitrosococcus mobilis* and *Nitrospira*-like bacteria as dominant populations. *Appl. Environ. Microbiol.* **64**: 3042-3051.
- <sup>d</sup> **Ludwig W, Kirchhof G, Klugbauer N, Weizenegger M, Betzl D, Ehrmann M, Hertel C, Jilg S, Tatzel R, Zitzelsberger H, Liebl S, Hochberger M, Shah J, Lane D, Wallnofer PR & Scheifer KH.** (1992). Complete 23S ribosomal-RNA sequences of Gram-positive bacteria with a low DNA G+C content. *Syst. Appl. Microbiol.* **15**: 487-501.

## **Description of the purpose-built CS<sub>2</sub> distribution system**

A CS<sub>2</sub> distribution system was developed to continuously flush the headspaces of the bottles and jars. In this system N<sub>2</sub> was led through a jar filled one third with liquid CS<sub>2</sub> that was kept at 15°C. The resulting CS<sub>2</sub> saturated nitrogen gas was mixed with air in a mixing vessel (2.5 l) that was kept under constant pressure by a back pressure valve. To obtain the desired CS<sub>2</sub> concentration, the mixing ratio of air with CS<sub>2</sub> saturated nitrogen gas was controlled by mass flow controllers (Brooks instrument BV, Ede, The Netherlands). The CS<sub>2</sub> containing gas from the mixing vessel was split into 15 individual gas lines of which the flow could be individually controlled by Sho-Rate Purgemeters (Brooks instrument BV, Ede, The Netherlands).

## **Growth characteristics on plate and in liquid culture**

Distinctly different colony morphologies were observed between the 16 isolated strains. Five strains (BBW1, BAW3, G8, S1p and BDW2) formed large dry, white colonies on Gelrite plates and white or yellow aggregates in stationary liquid culture. Strains G8, BAW3, BDW2 and BBW1 spread out over the Gelrite plates, ultimately covering the plates completely (Fig. S1A). Colonies of strain S1p remained compact. The white or yellow aggregates and whiteness of the colonies was not a result of more sulfur production by these strains. The other 11 strains formed smooth, shiny, compact colonies (Fig. S2A) and showed usually less aggregation in stationary liquid culture. The organisms that produced the large dry and white colonies are mainly present in cluster 1 and 4 of the phylogenetic tree constructed from the 16S-ISR sequences (Fig. 1).

There was a clear difference in the colony surface of the two types of strains when visualized by cryoSEM: those of the ‘white dry’ colonies were highly irregular, with valleys and peaks consisting of clumps of aligned cells. On central parts of colonies crystals were sometimes visible (Fig. S1B). The edges of the spread-out areas of the ‘white dry’ strains appeared to consist of a monolayer of cells, without crystals (Fig. S1C). The surfaces of ‘compact shiny’ colonies were smooth with defined holes and they were covered with a layer, preventing distinction of individual cells (Fig S2B-D). This is likely to be an extracellular polymeric substance (EPS), which usually consists of polysaccharides. Our results suggest that at least on solid media, the compactly growing strains produce more EPS than the spreading strains.

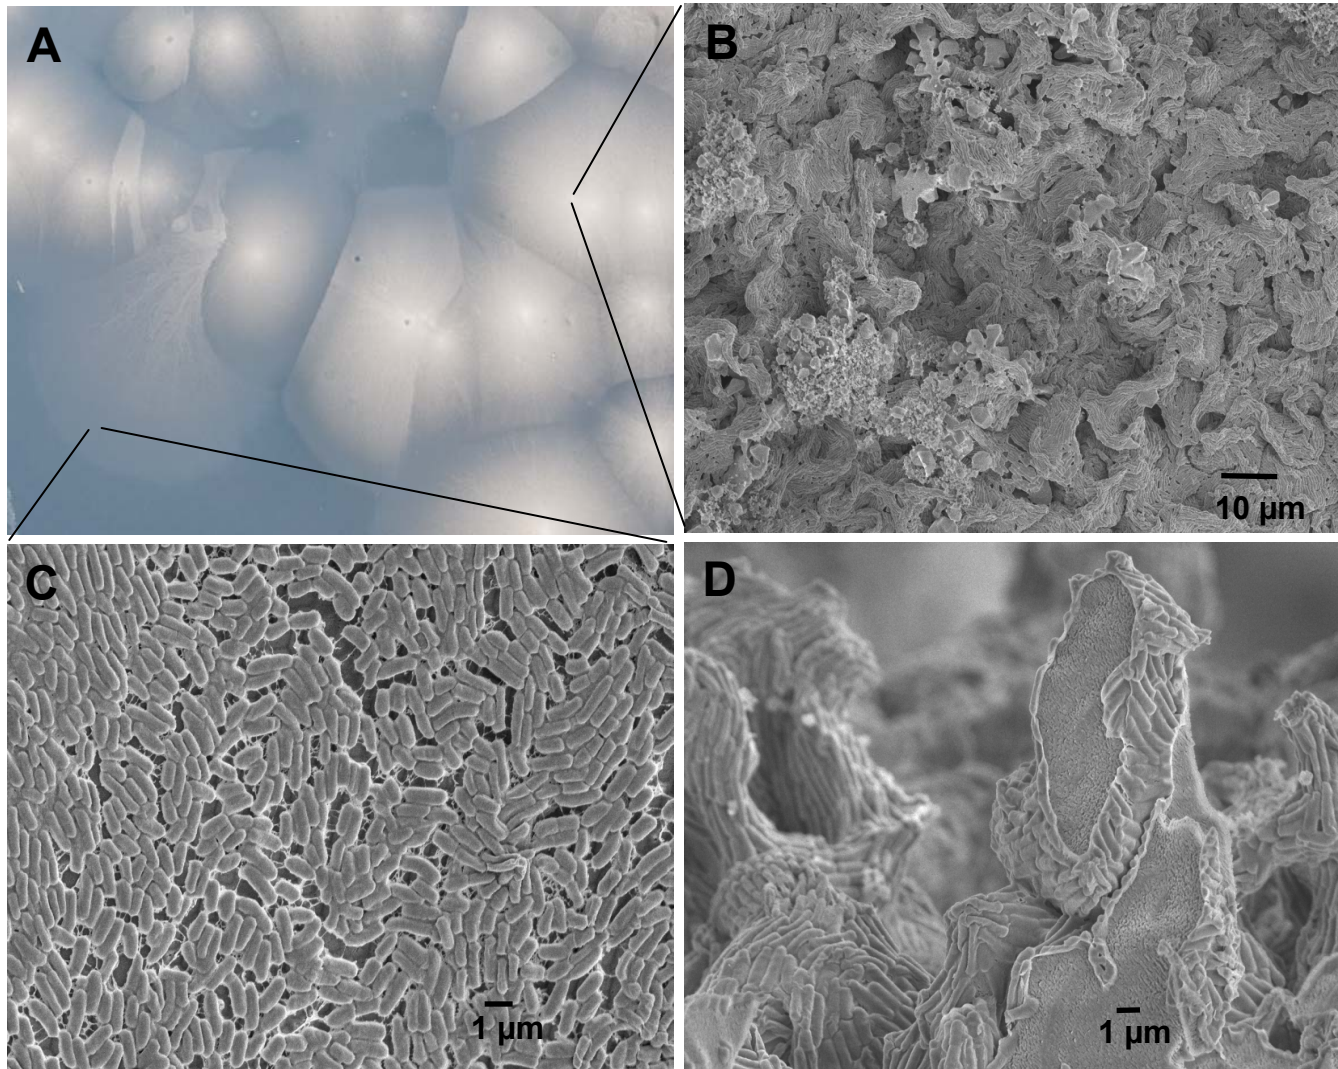

**FIG S1** Colony morphology on a Gelrite plate of strain G8 by photography (A) and cryoSEM (B-D). A) Large, white spread-out colonies. B) Surface of the centre of one of the colonies. C) Surface of the spread-out edge of one of the colonies. D) Cross-section through a central part of the colony.



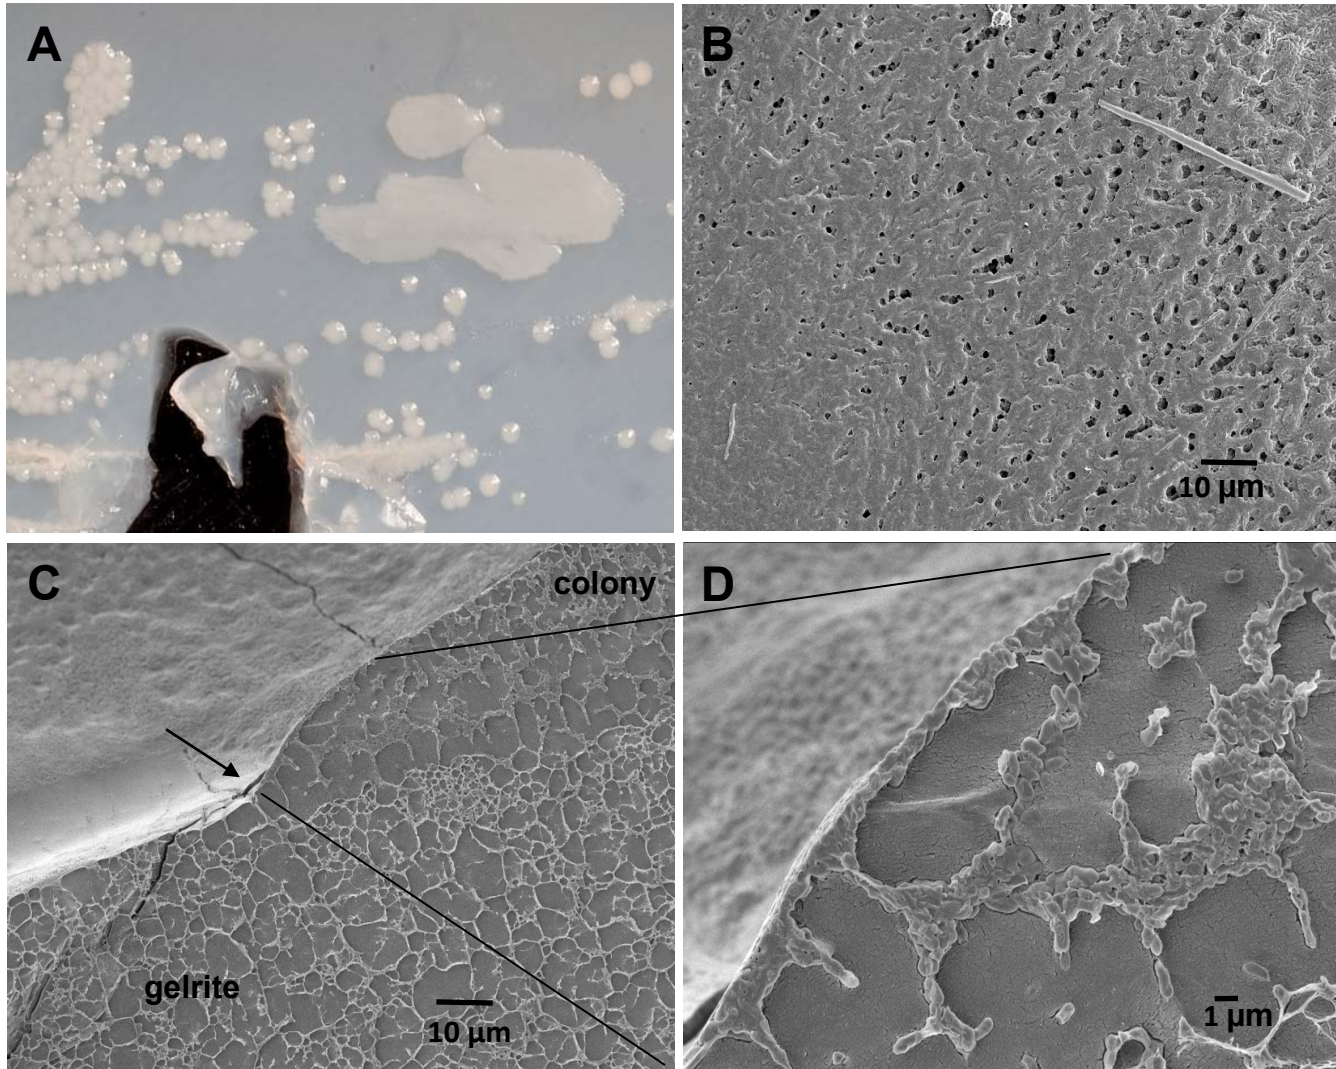

**FIG S2** Colony morphology on a Gelrite plate of strain 2Bp by photography (A) and cryoSEM (B-D). A) Small, shiny, smooth colonies. The hole indicates a spot where colonies were excised for cryoSEM. B) Surface of one of the colonies showing a smooth surface with gaps. C) Cross-section through a colony and underlying Gelrite. The arrow indicates the start of the edge of the colony. D) Enlargement of cross-section showing the top of the colony and the clusters of cells in the colony.

**Table S2** 16S-23S ISR length of the isolated CS<sub>2</sub> converting *A.thiooxidans* strains and the number of base pairs (bp) that differ from strain G8, which is used as reference strain. Isolate BDW2 from the Oy Visko reactor had an exceptionally small ISR of 439 bp. This is characteristic of *A. ferrooxidans* ISRs as proposed by Ni *et al.* (2007, 2008) and it therefore forms an exception to their grouping method.

| Strain  | Total | ISR1 | tRNA Ile | ISR 2 | tRNA Ala | ISR 3 | nr. different bp                   | GenBank Acc. |
|---------|-------|------|----------|-------|----------|-------|------------------------------------|--------------|
| G8      | 458   | 46   | 77       | 3     | 77       | 255   |                                    | KC902819     |
| Sts 4-3 | 458   | 46   | 77       | 3     | 77       | 255   | 1                                  | KC902820     |
| 1Bp     | 460   | 48   | 77       | 3     | 77       | 255   | 2 + 2 insertions                   | KC902818     |
| 2Ap     | 458   | 46   | 77       | 3     | 77       | 255   | 2                                  | KC902816     |
| 2Bp     | 458   | 46   | 77       | 3     | 77       | 255   | 2                                  | KC902817     |
| BEF1    | 458   | 46   | 77       | 3     | 77       | 255   | 4                                  | KC902823     |
| BEF3    | 458   | 46   | 77       | 3     | 77       | 255   | 4                                  | KC902829     |
| BAD2    | 458   | 46   | 77       | 3     | 77       | 255   | 1                                  | KC902821     |
| BBF2    | 459   | 47   | 77       | 3     | 77       | 255   | 4 + 1 insertion                    | KC902827     |
| BED2    | 458   | 46   | 77       | 3     | 77       | 255   | 2                                  | KC902828     |
| S1p     | 456   | 46   | 77       | 3     | 77       | 253   | 6 + 2 deletions                    | KC902824     |
| BC6-1   | 456   | 46   | 77       | 3     | 77       | 253   | 7 + 2 deletions                    | KC902831     |
| BDW2    | 439   | 43   | 77       | 3     | 76       | 240   | 18 + 19 deletions                  | KC902822     |
| BAW3    | 458   | 45   | 77       | 3     | 77       | 256   | 57 + 3 deletions<br>+ 3 insertions | KC902825     |
| BBW1    | 458   | 45   | 77       | 3     | 77       | 256   | 57 + 3 deletions<br>+ 3 insertions | KC902826     |

Ni YQ, Yang Y, Bao JT, He KY, Li HY. 2007. Inter- and intraspecific genomic variability of the 16S-23S intergenic spacer regions (ISR) in representatives of *Acidithiobacillus thiooxidans* and *Acidithiobacillus ferrooxidans*. FEMS Microbiol. Lett. **270**: 58-66.

Ni Y, Wan D, He K. 2008. 6S rDNA and 16S-23S internal transcribed spacer sequence analyses reveal inter- and intraspecific *Acidithiobacillus* phylogeny. Microbiology-SGM. **154**: 2397-2407.

**Table S3** Comparison of protein, carbon and sulfur yields of CS<sub>2</sub> converting *A. thiooxidans* strains growing in continuous culture with CS<sub>2</sub> as the sole energy source. Measurements were performed over a period of 40 days and values are average ± SEM for 6 to 10 replicates. For strain BBW1, only one optical density measurement was done and yield was not determined (n.d.).

| Strain | Yield (g·mole CS <sub>2</sub> <sup>-1</sup> ± SEM) |            |           |           |
|--------|----------------------------------------------------|------------|-----------|-----------|
|        | OD <sub>600</sub>                                  | Protein    | Carbon    | Sulfur    |
| 2Bp    | 0.279 ± 0.015                                      | 13.1 ± 1.6 | 5.4 ± 0.3 | 1.4 ± 0.3 |
| Sts4-3 | 0.205 ± 0.006                                      | 11.6 ± 1.2 | 4.6 ± 0.1 | 0.4 ± 0.2 |
| S1p    | 0.233 ± 0.012                                      | 12.9 ± 1.4 | 4.7 ± 0.2 | 1.7 ± 0.4 |
| G8     | 0.261 ± 0.011                                      | 11.7 ± 1.4 | 4.4 ± 0.2 | 2.2 ± 0.6 |
| BBW1   | 0.238                                              | n.d.       | n.d.      | n.d.      |

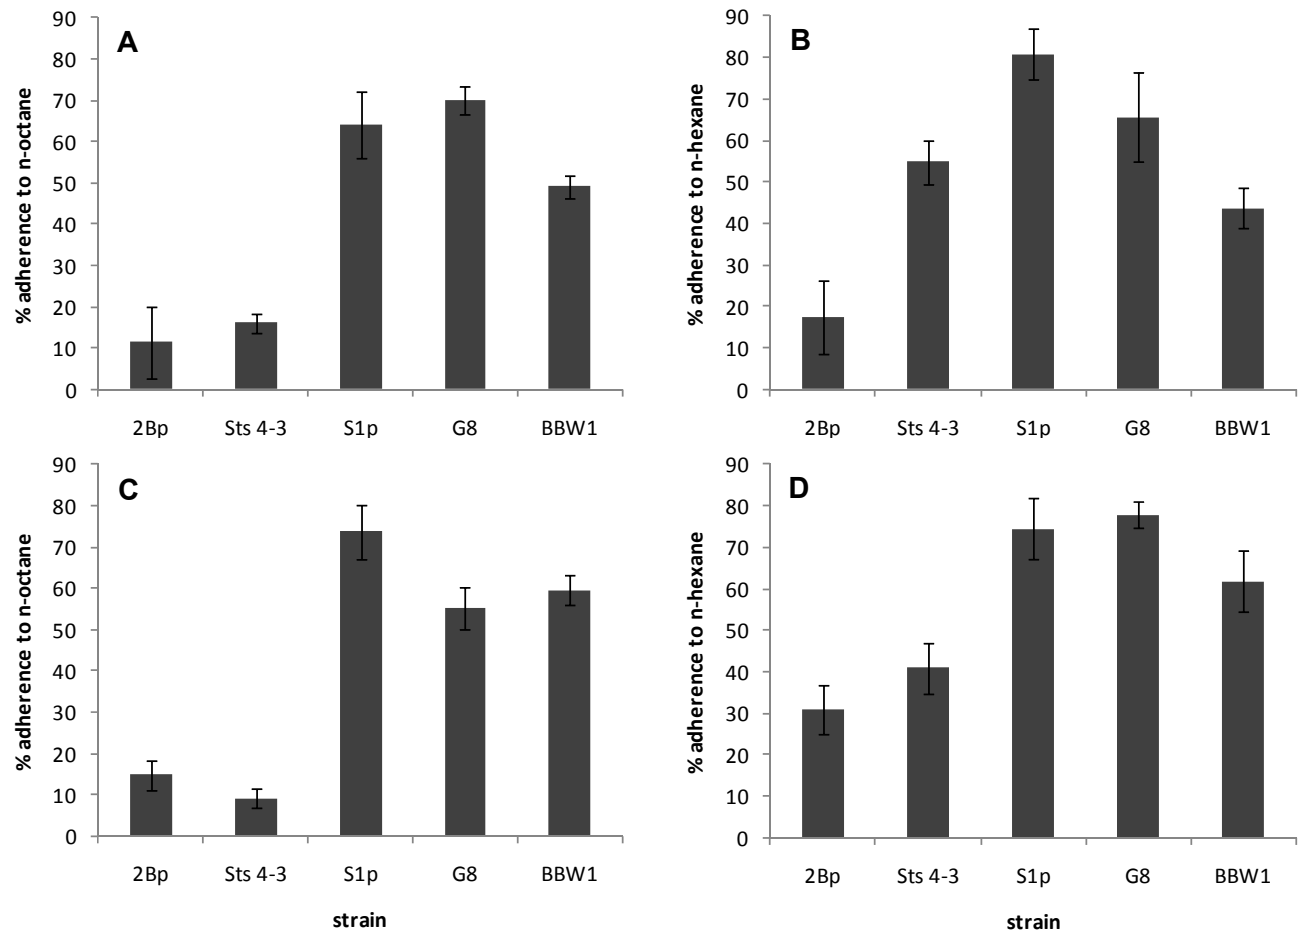

**FIG S3** Cell surface hydrophobicity of five CS<sub>2</sub> converting *A. thiooxidans* strains at pH 7 (A, B) and pH 3 (C, D). Values are means  $\pm$  SEM from three (pH 3) or four (pH 7) independent experiments. % adherence was calculated as  $(1-At/A0) \times 100$ , with A0: absorbance of the culture before mixing with solvent and At: absorbance of the aqueous phase after mixing and 20 min settling. Absorbance was measured at 400 nm.

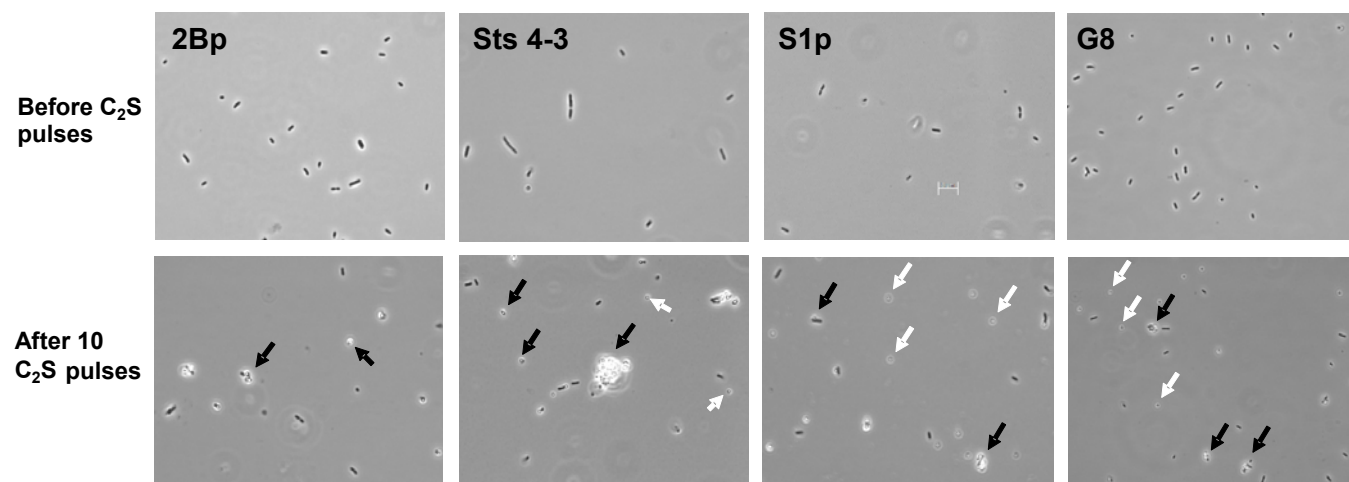

**FIG S4** Microscopic examination of S<sup>0</sup> accumulation in *A. thiooxidans* strains 2Bp, Sts 4-3, S1p and G8 before (top row) and after 10 CS<sub>2</sub> pulses (bottom row). Examples of detached S<sup>0</sup> globules are indicated with white arrows and cell-attached S<sup>0</sup> globules with black arrows.
